# Supplementary material
Source: Springer Nature journal article supplement (https://www.springermedizin.de/resource/supplementary/13229_2013_83_MOESM4_ESM.pdf/9676132)

## P7 Whole Blood 5-HT in Females

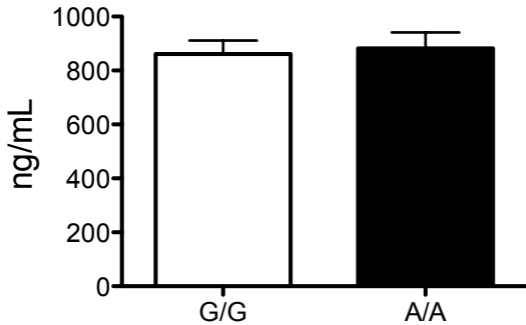

Supplement: MOESM4 [file 9676132]
